# Supplementary material for: High thermal and electrochemical stability of a SiO2 nanoparticle hybird–polyether cross-linked membrane for safety reinforced lithium-ion batteries
Source: Royal Society of Chemistry journal article supplement (doi:10.1039/c5ra26694g), 2016-01-01

## High Thermal and Electrochemical Stability of SiO<sub>2</sub> Nanoparticle Hybrid-Polyether Cross-Linked Membrane for Safety Reinforced Lithium-Ion Batteries

*Chun-Han Hsu, Li-Hsuan Chien and Ping-Lin Kuo\**

*Department of Chemical Engineering, National Cheng Kung University, Tainan,*

*Taiwan 70101 ROC*

\*Author to whom all correspondence should be addressed

Tel.: +886-6-275 7575; Fax: +886-6-276 2331

e-mail: \*[plkuo@mail.ncku.edu.tw](mailto:plkuo@mail.ncku.edu.tw)

**Figure S1** Comparison of resistance values of the NX-20S membranes after cycling.

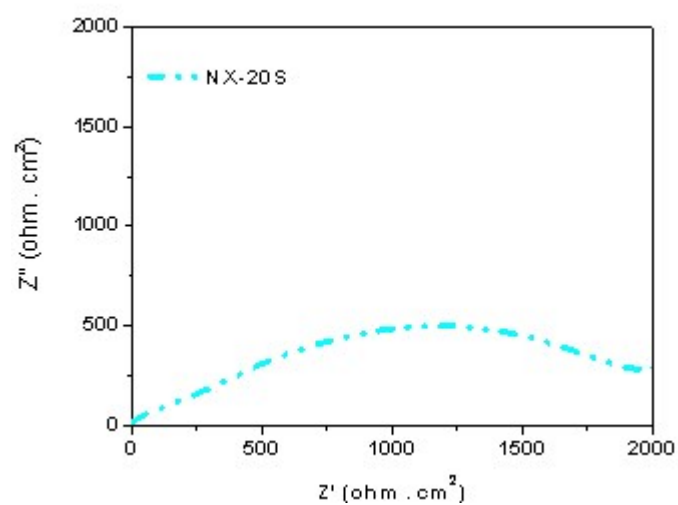

Supplement: c5ra26694g1.pdf [file c5ra26694g1.pdf]
